# Supplementary material
Source: publisher figshare collection journal article supplement (https://acs.figshare.com/ndownloader/files/4028266)

# ***$\epsilon$ -Decalactone: a thermoresilient and toughening comonomer to poly(L-lactide)***

*Peter Olsén, Tina Borke, Karin Odelius, and Ann-Christine Albertsson\**

Department of Fibre and Polymer Technology, KTH Royal Institute of Technology,  
SE-100 44, Stockholm, Sweden

\*Corresponding author: [aila@polymer.kth.se](mailto:aila@polymer.kth.se)

Tel. +46-8-790 82 74 Fax: +46-8-20 84 77

## **Supporting Information**

### **Figure S1.**

Conversion as a function of reaction time for the bulk copolymerization of DL ( $\square$ ) and LA ( $\blacksquare$ ) at 110 °C with  $[DL]/[LA] \approx 1$ ,  $[DL+LA]/[Sn(Oct)_2] \approx 200$  and  $M_{n,theory} \approx 30,000$  g/mol measured by  $^1H-NMR$ .

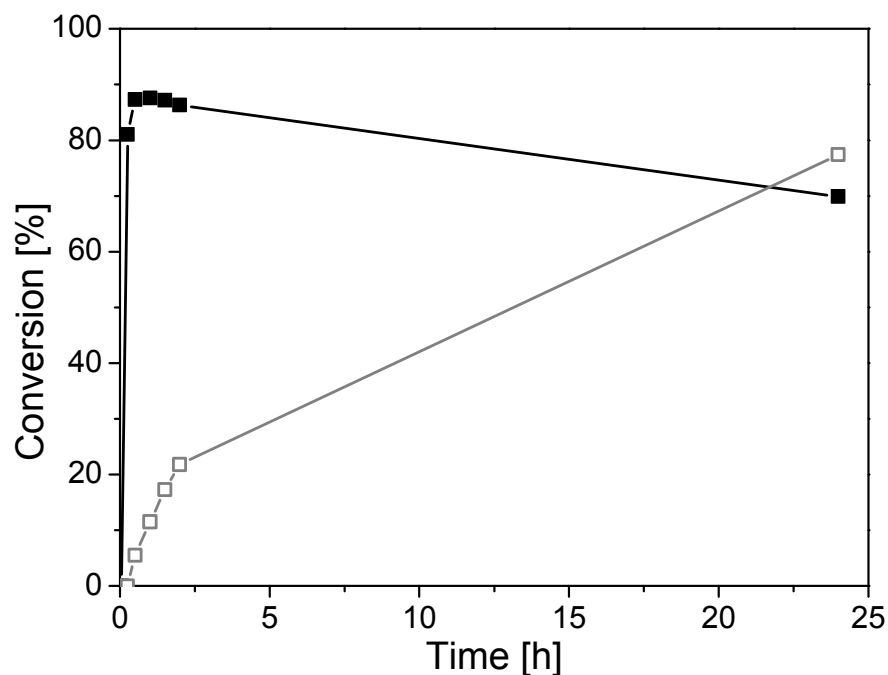

**Figure S2.**

Mol fractions of DL ( $\square$ ) and LA ( $\blacksquare$ ) incorporated into the polymer with time, determined by  $^1\text{H-NMR}$ . LA polymerizes first and reaches its highest conversion after 30 min. DL- units are subsequently incorporated by transesterification

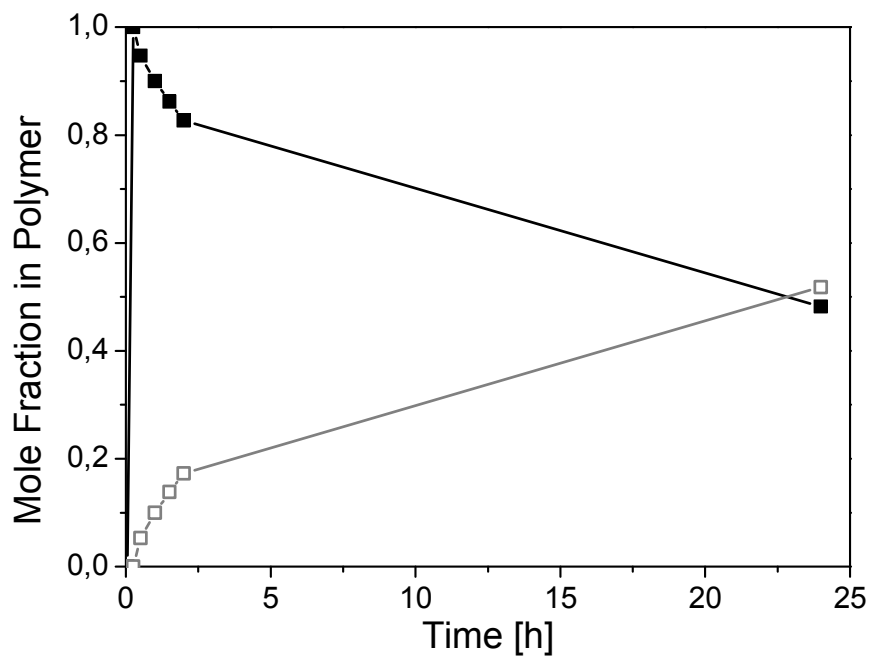

**Figure S3.**

$^{13}\text{C-NMR}$  spectrum of PDL polymerized with  $\text{Sn}(\text{Oct})_2/\text{benzyl alcohol}$  for 134 h at  $110\text{ }^\circ\text{C}$ . The inset shows the structure of PDL with assignment of the signals.

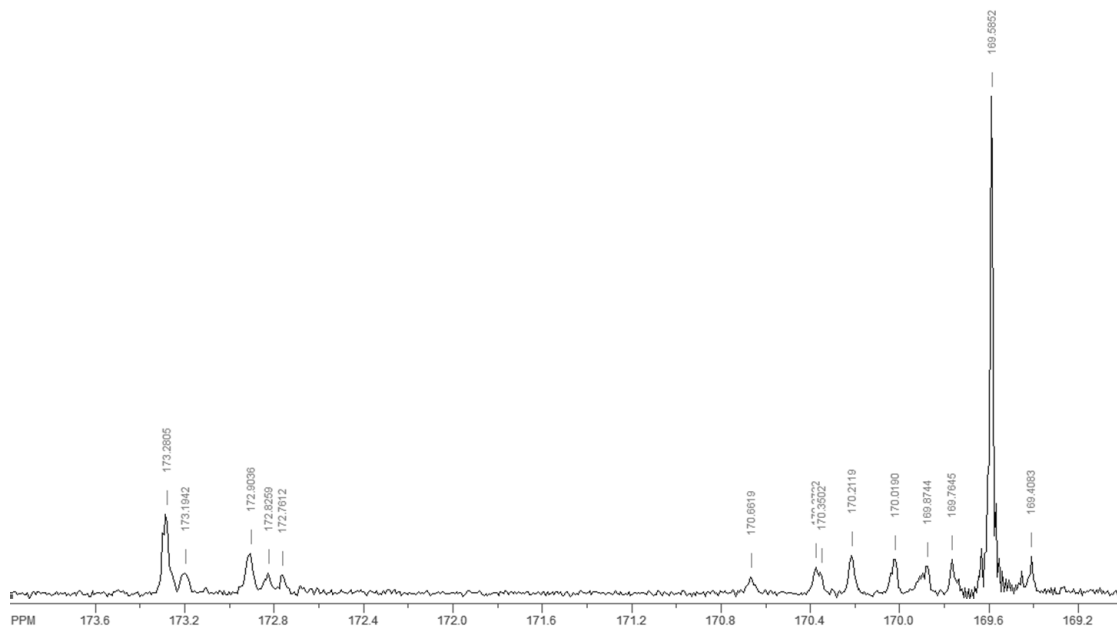

**Figure S4.**

Detail of the  $^{13}\text{C}$ -NMR spectrum of a random PLA/PDL-copolymer showing the carbonyl region. The peaks at 169.6 ppm and 173.3 ppm belong to PLA- and PDL-homopolymer blocks, respectively. The other signals originate from a randomized structure that is a consequence of transesterification reactions.

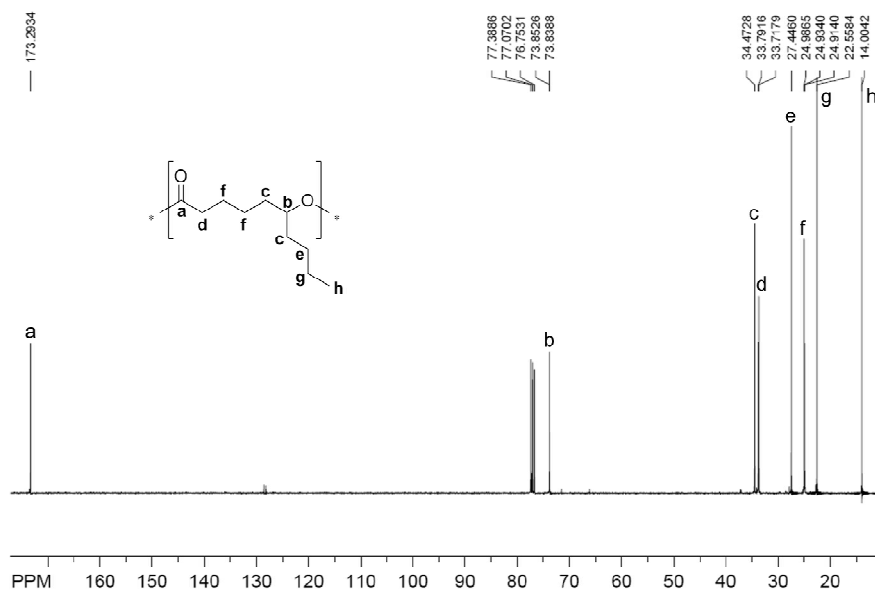

**Figure S5**

$^1\text{H}$ -NMR spectra of (I.) a random PLA/PDL copolymer and (II.) a block copolymer showing different signals and peak pattern according to the neighboring monomer units

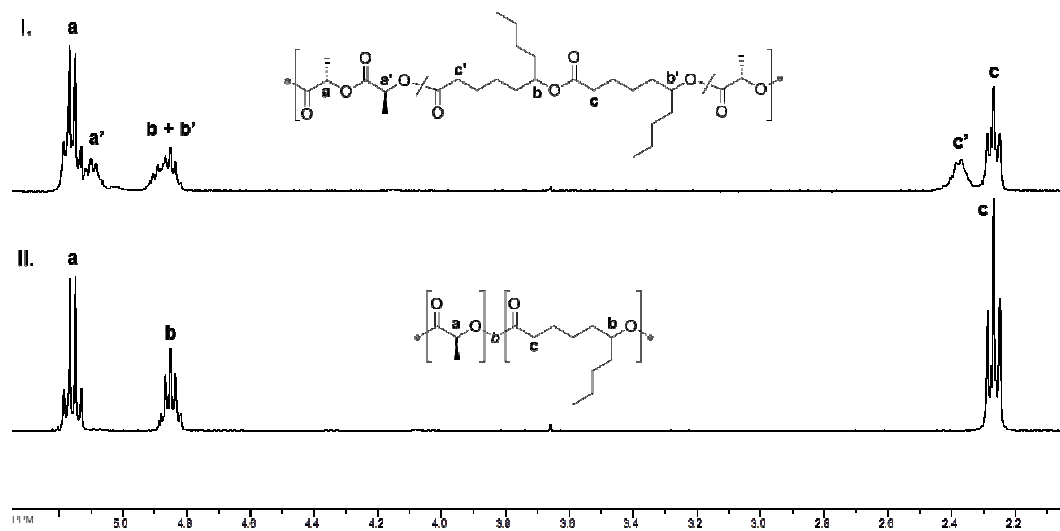

Supplement: Supplementary file 1 [file 4028266]
